# Supplementary material for: Assessment of trade-off balance of maize stover use for bioenergy and soil erosion mitigation in Western Kenya
Source: Frontiers journal article supplement (doi:10.3389/fsufs.2025.1409457), 2025-02-07
Supplement: Data_Sheet_1.docx [file Data_Sheet_1.docx]

Supplemental Table 1:

Different factors for RUSLE model

| Factor | Variables | Unit | Data Resource |
| --- | --- | --- | --- |
| R | precipitation | mm/year | http://www.worldclim.org/current |
| K | Sand fraction | % | https://www.isric.org/projects/soil-property-maps-africa-250-m-resolution |
| K | Silt fraction | % |
| K | Clay fraction | % |
| K | Organic Carbon | % |
| LS | Slope gradient | Degree | Shuttle Radar Topography Mission (SRTM) |
| C | The annual mean value of The normalized difference vegetation index (NDVI) | - | https://www.planet.com/basemaps |
| P | Slope gradient | Degree | Shuttle Radar Topography Mission (SRTM) |

Supplmental Table 2:

Equations for RUSLE model

| Target | Equation |
| --- | --- |
| KUSLE | = fcsand fci si forgc fhisand |
| KRUSLE | = K factor = KUSLE 0.137 |
| fcsand |  |
| fci-si |  |
| forgc |  |
| fhisand |  |

where,

fcsand : a factor that equates low soil erodibility to soil with high coarse sand content and high values to soils with minute sand

fci – si : a factor that equates low erodibility to soils with high caly to silt ratios

forgc : a soil erodibility factor based on its organic carbon content

fhisa : a soil erodibility factor based on its sandiness

ms : sand fraction content (particles with a diameter of 0.5 to 2 mm diameter ) (%)

msilt : silt fraction content (particles with a diameter of 0.002 to 0.5 mm) (%)

mc : clay fraction content (particles <0.002 mm in diameter) (%)

orgC : organic carbon fraction content (%)


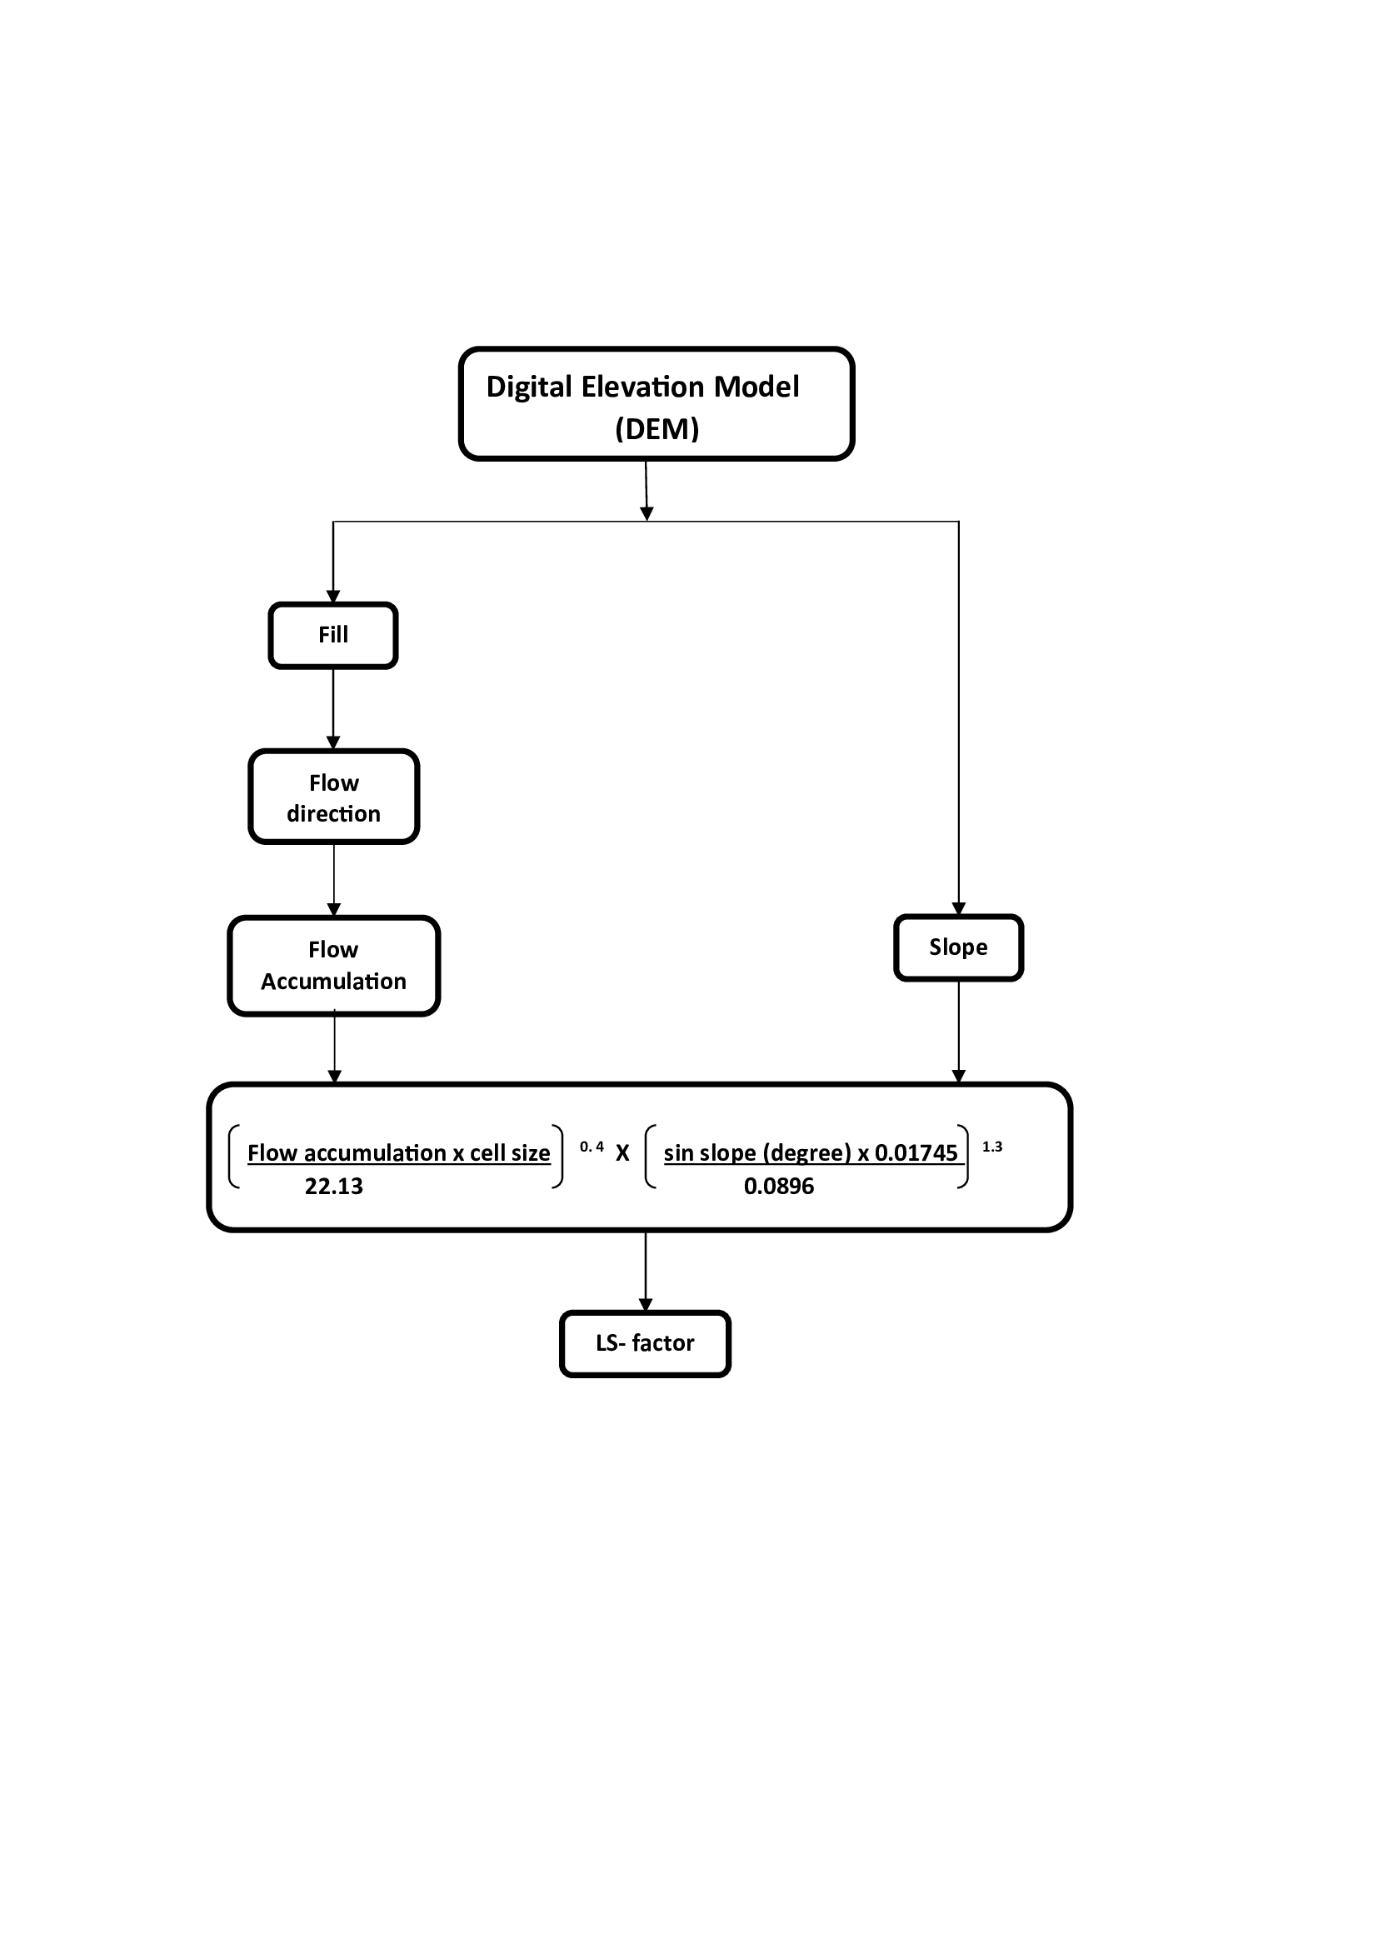
Supplmental Figure 1: Flow chart of L-S factor for RUSLE model

Supplemental Figure 2
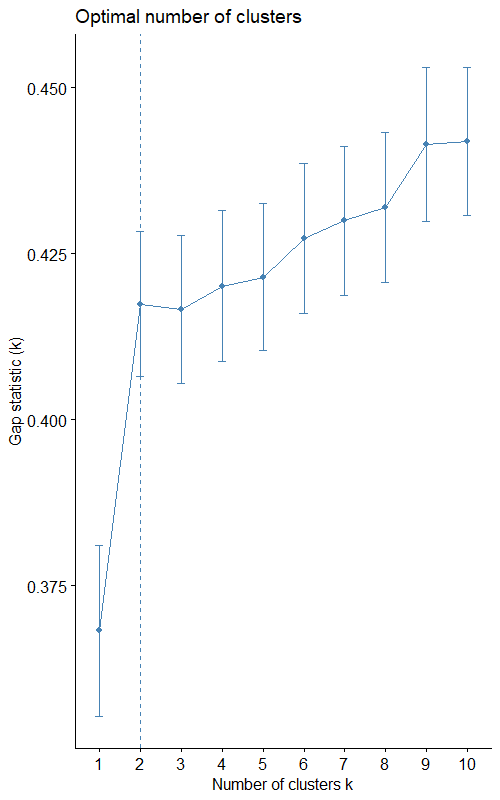


Supplemental Figure 3: Clustering analysis


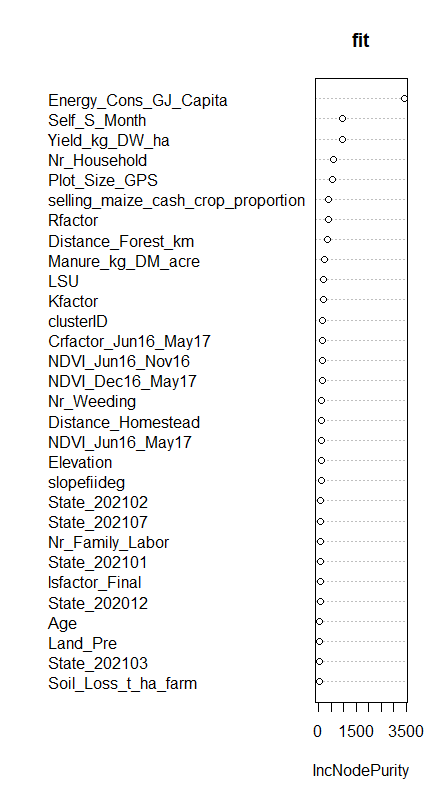


Supplemental Figure 4: List of major variables for decision tree machine learning method
